# Supplementary material
Source: MDPI journal article supplement (https://www.mdpi.com/2813-2882/1/1/3)
Supplement: s1 [file s1]

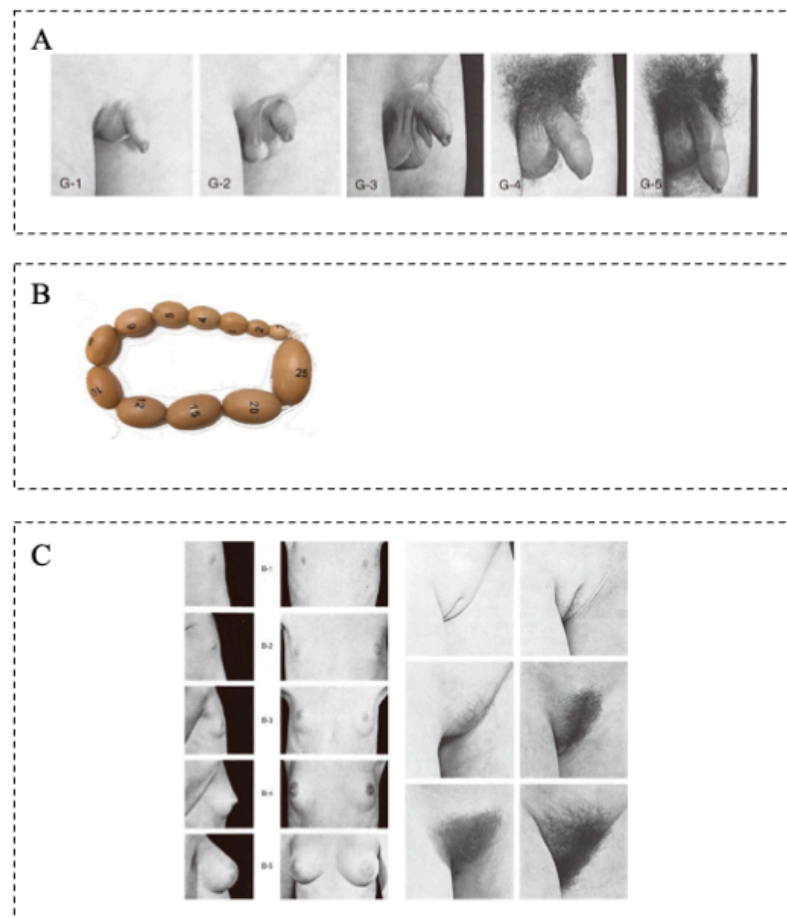

**Supplementary Figure S1.** Tanner stages of secondary sexual characteristics and pubic hair for male and female. (A). Stages of male genital development and pubic hair development according to Marshall and Tanner (1969); (B). Model of testis volume; (C). Stages female breast development (left) and pubic hair (right) according to Marshall and Tanner (1969). Diagrams 1965 Netherlands: Second National Survey on 0-24 Year Olds. Netherlands Institute for Preventative Medicine TNO. Groningen, The Netherlands: Wolters-Noordhoff; 1971. Additional data from Marshall WA, Tanner JM. Variations in pattern of pubertal changes in girls. Arch Dis Child. 1969;44:291-303.)

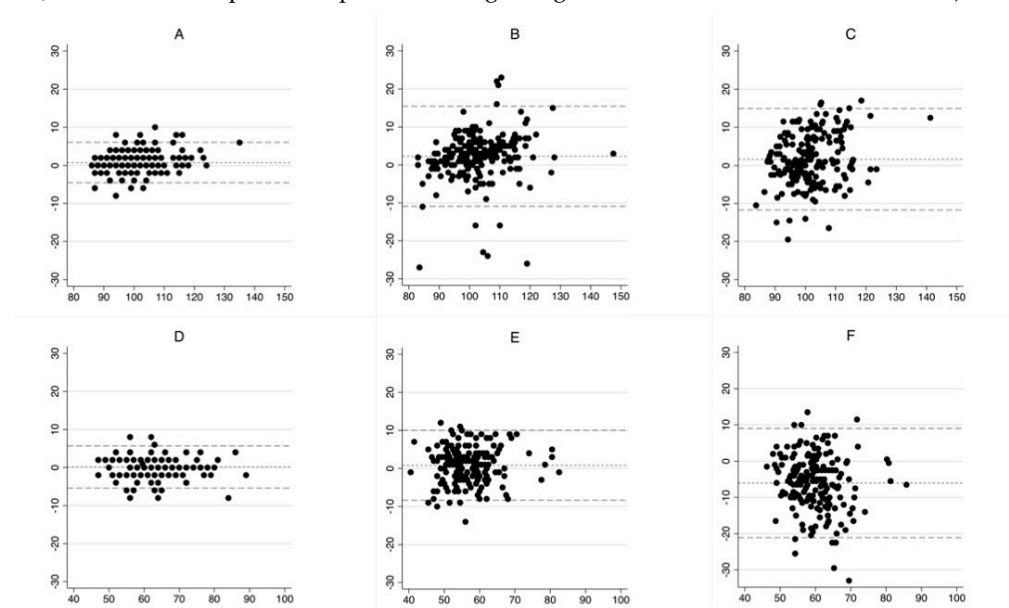

**Supplementary Figure S2.** Bland-Altman plots plot of SBP and DBP difference measured by mercury sphygmomanometer and electronic monitor. (A). SBP difference measured by mercury sphygmomanometer; (B). SBP difference measured by electronic monitor; (C). SBP measured by mercury and electronic monitor; (D). DBP difference measured by mercury sphygmomanometer; (E). DBP difference measured by electronic monitor; (F). DBP measured by mercury and electronic monitor. SBP, systolic blood pressure; DBP, diastolic blood pressure. X-axis represented the average of two measurements, while the Y-axis represented the difference of two measurements.

**Supplementary Table S1.** Population-based height in urban area, Fujian, and r-values used for prediction of adult height.

| Age, years | Male height |      |      | Female height |      |      |
|------------|-------------|------|------|---------------|------|------|
|            | Mean        | SD   | r    | Mean          | SD   | r    |
| 7          | 129.01      | 4.43 | 0.81 | 127.09        | 4.4  | 0.70 |
| 8          | 134.3       | 4.83 | 0.83 | 131.87        | 4.84 | 0.72 |
| 9          | 139.74      | 5.1  | 0.84 | 139.67        | 5.73 | 0.72 |
| 10         | 143.72      | 6.16 | 0.85 | 145.41        | 6.03 | 0.70 |
| 19~22      | 173.21      | 5.8  | -    | 160.37        | 5.13 | -    |

SD, standard deviation. r was the correlation coefficient of present height and adult height. Molinari L, Gasser T, Largo RH, Prader A. 1995. Child-adult correlations for anthropometric measurements. In: Hauspie R, Lindgren G, Falkner F, editors. Essays on auxology. Welwyn Garden City: Castlemead Publications. P164-177.
